# Supplementary material
Source: publisher site journal article supplement (https://www.dovepress.com/article/401598)
Supplement: Supplementary file 1 [file get_supplementary_file.php]

# Supplementary information

**Title**: Real-life anemia management among patients with non-dialysis-dependent chronic kidney disease in three European countries

**Authors**: Danilo Fliser1, Maria Mata Lorenzo2, Katherine Houghton3, Claire Ainsworth3†, Martin Blogg2, Elena González de Antona Sánchez4, José Portolés5

**Affiliations**:1Saarland University Medical Center, Homburg, Germany; 2Astellas Pharma Europe Ltd., Addlestone, UK; 3RTI Health Solutions, Manchester, UK; 4Astellas Pharma España S.A., Madrid, Spain; 5Hospital Universitario Puerta de Hierro, Madrid, Spain

†Current affiliation: OPEN Health Evidence & Access, Manchester, UK

***Corresponding author**:

Danilo Fliser

Saarland University Medical Center, Homburg, Germany

Tel.: +49 – (0)6841 – 16 15040

Fax: +49 – (0)6841 – 16 15454

Email: [danilo.fliser@uks.eu](mailto:danilo.fliser@uks.eu)

## Supplementary Table 1 Association of baseline variables and time to initiation of ESA with time to dialysis and time to ESRD

|  | **Time to dialysis** | | **Time to ESRD** | |
| --- | --- | --- | --- | --- |
|  | **HR (95% CI)** | **P valuea** | **HR (95% CI)** | **P valuea** |
| Age, years | 0.979 (0.965, 0.992) | 0.002 | 0.986 (0.973, 0.998) | 0.020 |
| Sex |  |  |  |  |
| Male | Ref | Ref | Ref | Ref |
| Female | 0.745 (0.511, 1.086) | 0.125 | 0.922 (0.673, 1.263) | 0.615 |
| Country |  |  |  |  |
| Spain | Ref | Ref | Ref | Ref |
| Germany | 1.131 (0.706, 1.813) | 0.608 | 0.996 (0.654, 1.518) | 0.986 |
| UK | 0.740 (0.474, 1.156) | 0.185 | 0.798 (0.547, 1.164) | 0.241 |
| Time to ESA initiation following anemia diagnosis, years | 1.020 (0.908, 1.146) | 0.733 | 1.014 (0.933, 1.101) | 0.747 |
| eGFR, mL/min/1.73m2, at baseline | 0.947 (0.921, 0.974) | <0.001 | 0.931 (0.908, 0.954) | <0.001 |
| CKD stage at time of anemia diagnosis |  |  |  |  |
| Stage 3b | 0.377 (0.197, 0.722) | 0.003 | 0.540 (0.280, 1.039) | 0.065 |
| Stage 4 | 0.406 (0.226, 0.730) | 0.003 | 0.562 (0.308, 1.025) | 0.060 |
| Stage 5 | Ref | Ref | Ref | Ref |
| CCI category at baseline |  |  |  |  |
| Mild (1–2) | 0.774 (0.259, 2.313) | 0.647 | 1.209 (0.483, 3.029) | 0.685 |
| Moderate (3–4) | 0.948 (0.554, 1.624) | 0.847 | 1.142 (0.701, 1.862) | 0.594 |
| Severe (≥5) | Ref | Ref | Ref | Ref |
| ESA type first initiated |  |  |  |  |
| Short-acting | 0.669 (0.391, 1.146) | 0.144 | 0.755 (0.485, 1.176) | 0.214 |
| Long-actingb | Ref | Ref | Ref | Ref |
| ESA weekly dose groupc |  |  |  |  |
| Group 1 | 1.112 (0.610, 2.027) | 0.729 | 1.331 (0.753, 2.354) | 0.325 |
| Group 2 | 1.549 (0.778, 3.084) | 0.213 | 1.853 (0.979, 3.508) | 0.058 |
| Group 3+4 | Ref | Ref | Ref | Ref |

Only patients with non-missing data on all covariates were included in the model (n=670). aDifferences assessed using the Wald test. bMPG-EPO is included with darbepoetin alfa in the long-acting ESA group for this analysis, due to small sample size. cGroup 1: <5,000 IU short-acting / <5,000 IU darbepoetin alfa / <1,800 IU MPG-EPO; medium dose: ≥5,000 to ≤8,000 IU short-acting / ≥5,000 to <8,000 IU darbepoetin alfa / ≥1,800 to <3,000 IU MPG-EPO; high dose: >8,000 IU short-acting / ≥8,000 IU darbepoetin alfa / ≥3,000 IU MPG-EPO. CCI, Charlson comorbidity index; CI, confidence interval; CKD, chronic kidney disease, eGFR, estimated glomerular filtration rate; ESA, erythropoiesis-stimulating agent; HR, hazard ratio; IU, international units; MPG-EPO, methoxy polyethylene glycol-epoetin beta; ref, reference

## Supplementary Figure 1 Study design.

**
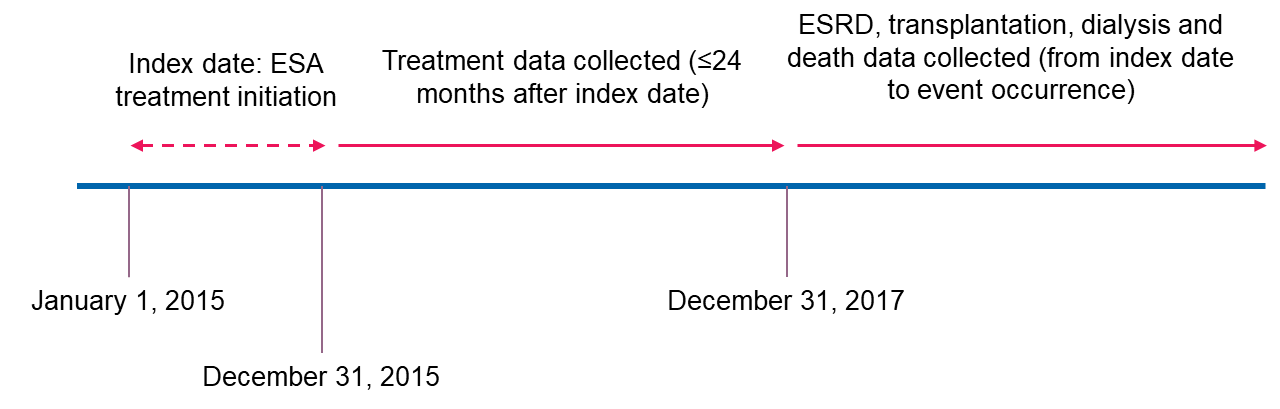
**

ESA, erythropoiesis-stimulating agent; ESRD, end-stage renal disease

## Supplementary Figure 2 ESA treatment changes.


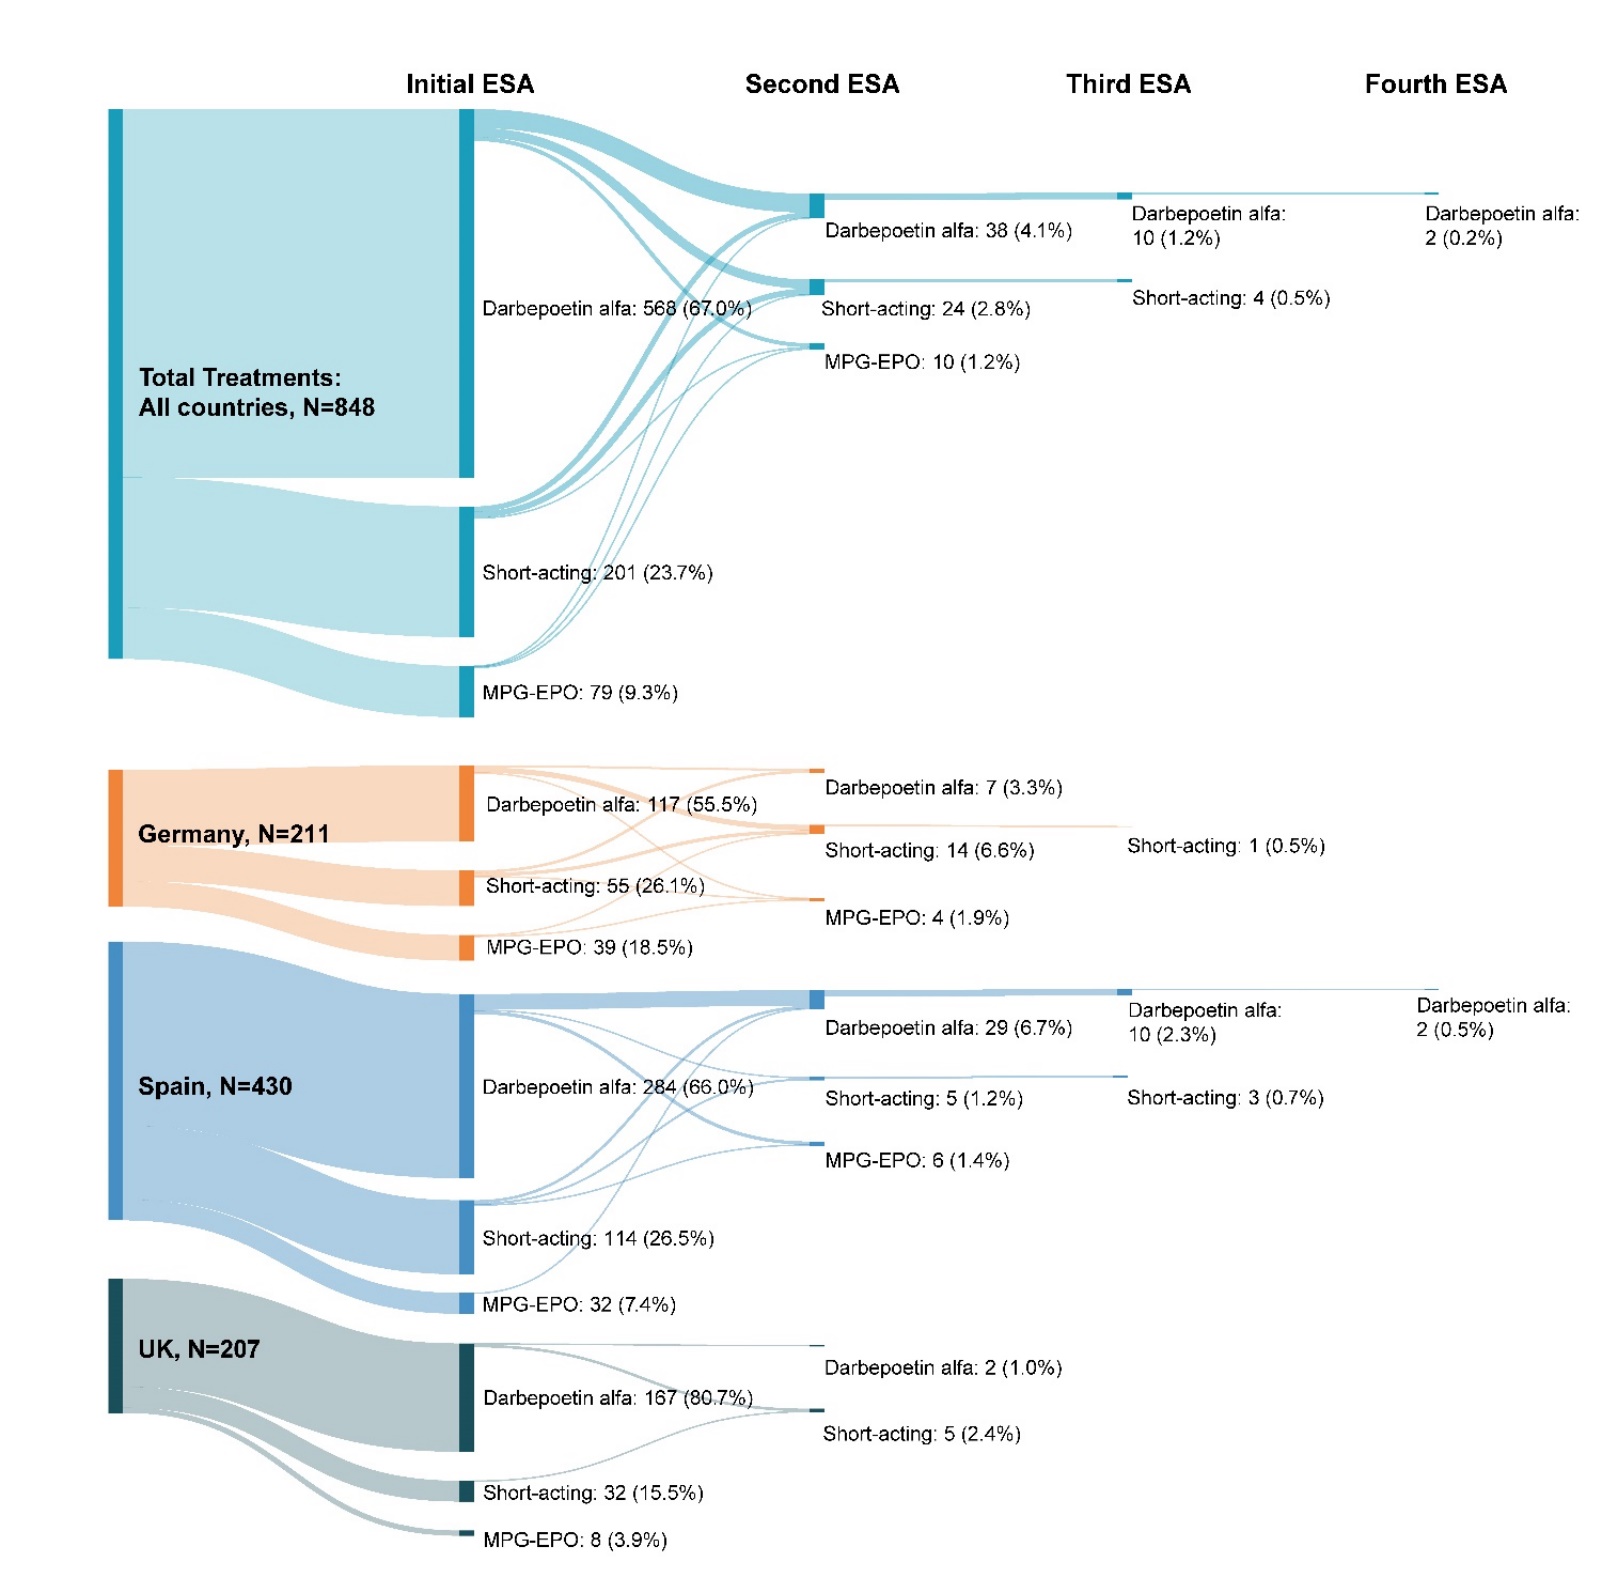


ESA, erythropoiesis-stimulating agent; MPG-EPO, methoxy polyethylene glycol-epoetin beta

## Supplementary Figure 3 Blood transfusions and deaths by A) inflammation status and B) ESA dose group


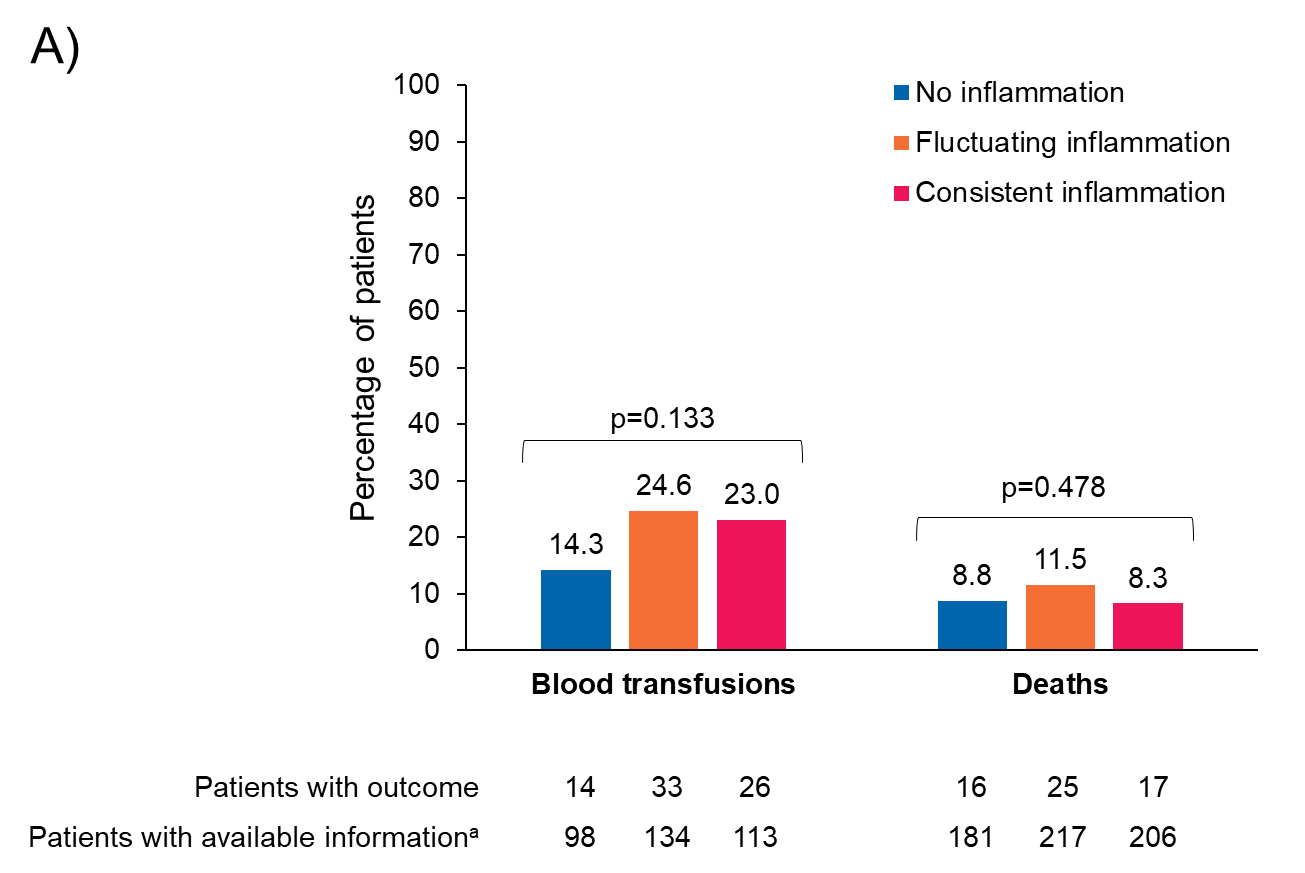


aPercentages are calculated based on the number of patients with information available, excluding those for whom “don’t know” was a collected response on the CRF. Between-group differences were assessed using Fisher’s exact test. Data on blood transfusions were extracted from ESA initiation until the earliest of the following: 24 months after initiation, the last available medical record, ESRD, transplantation, dialysis, or death. Data on the incidence of death were collected from ESA initiation until the date of medical record abstraction. Inflammation status was assessed using all CRP data during the 24-month observation period following ESA initiation: no inflammation (CRP consistently recorded at <5 mg/L), fluctuating inflammation (CRP levels varied between <5 mg/L and ≥5 mg/L across testing occasions), or consistent inflammation (CRP consistently recorded at ≥5 mg/L). CRF, chronic renal failure; CRP, C-reactive protein; ESA, erythropoiesis-stimulating agent; ESRD, end-stage renal disease


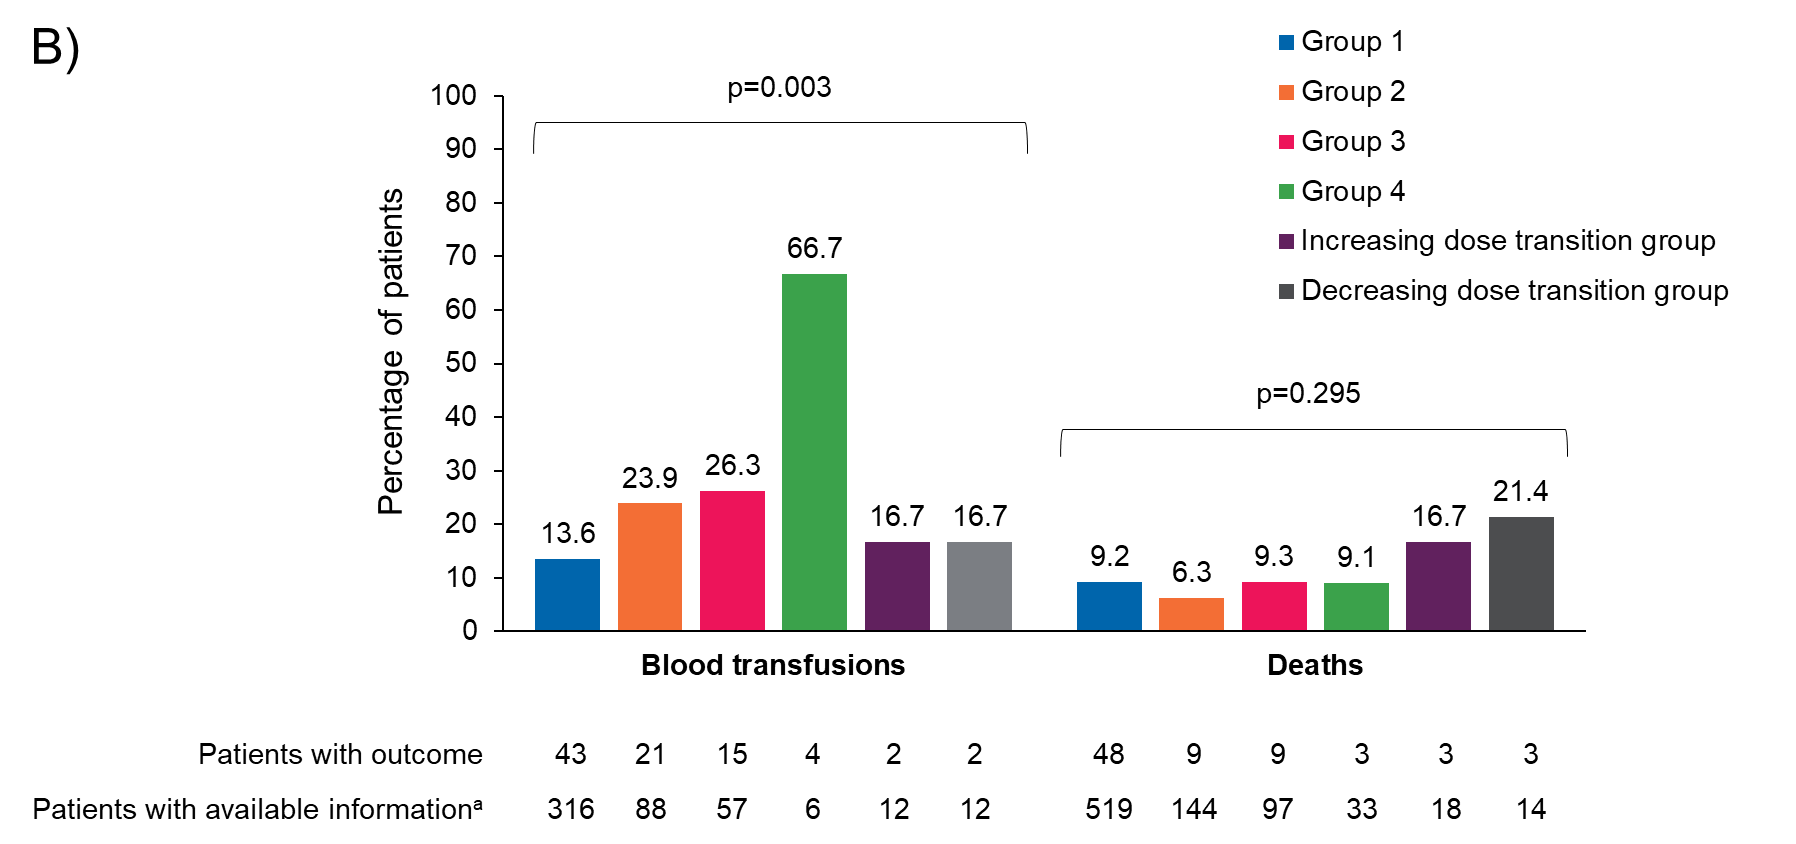


aPercentages calculated based on the number of patients with information available, excluding those for whom “don’t know” was a collected response on the CRF. Between-group differences were assessed using Fisher’s exact test. Data on blood transfusions were extracted from ESA initiation until the earliest of the following: 24 months after initiation, the last available medical record, ESRD, transplantation, dialysis, or death. Data on the incidence of death were collected from ESA initiation until the date of medical record abstraction. ESA weekly dose groups were defined as follows: Group 1, <5,000 IU short-acting / <5,000 IU darbepoetin alfa / <1,800 IU MPG-EPO; Group 2, ≥5,000 to ≤8,000 IU short-acting / ≥5,000 to <8,000 IU darbepoetin alfa / ≥1,800 to <3,000 IU MPG-EPO; Group 3, >8,000 to ≤16,000 IU short-acting / ≥8,000 to ≤16,000 IU darbepoetin alfa / ≥3,000 to <5,400 IU MPG-EPO; Group 4, >16,000 IU short-acting / >16,000 IU darbepoetin alfa / ≥5,400 IU MPG-EPO. Patients included in the dosing range subgroups remained within that dosing range for the duration of the study period; patients who transitioned between dosing range subgroups during the study period are included in the “increased dosing transition” and “decreased dosing transition” subgroups, as appropriate. Between-group differences were assessed using Fisher’s exact test. CRF, chronic renal failure; ESA, erythropoiesis-stimulating agent; ESRD, end-stage renal disease; IU, international units; MPG-EPO, methoxy polyethylene glycol-epoetin beta
